# Supplementary material for: Crustal Structure of the Nile Delta: Interpretation of Seismic-Constrained Satellite-Based Gravity Data
Source: MDPI journal article supplement (doi:10.3390/rs13101934), 2021-05-15
Supplement: s1 [file s1]

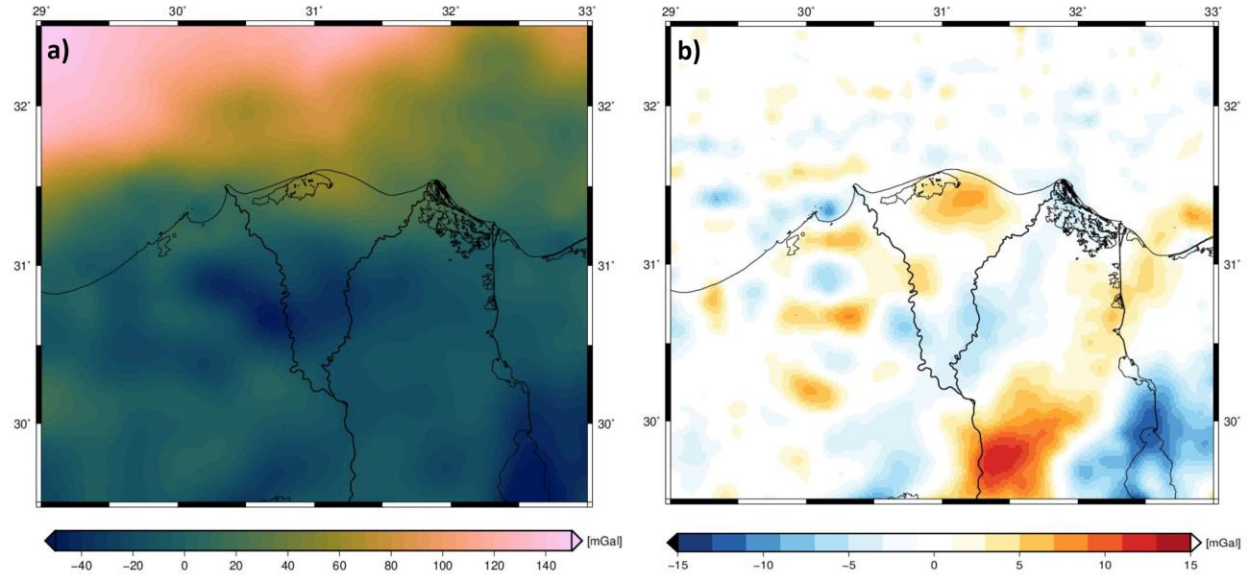

Figure S1: (a) The modeled (from the 3-D forward model) Bouguer gravity map of the Nile Delta (b) The gravity residuals, which represents the difference between the modeled (S1 a) and observed Bouguer data (Fig. 3c).
